# Supplementary material for: Professional quality of life, sleep disturbance and health among nurses: A mediation analysis
Source: PubMed Central journal article supplement (PMC9584477; doi:10.1002/nop2.978), 2021-07-22
Supplement: NOP2-9-2771-s001.pdf [file NOP2-9-2771-s001.pdf]

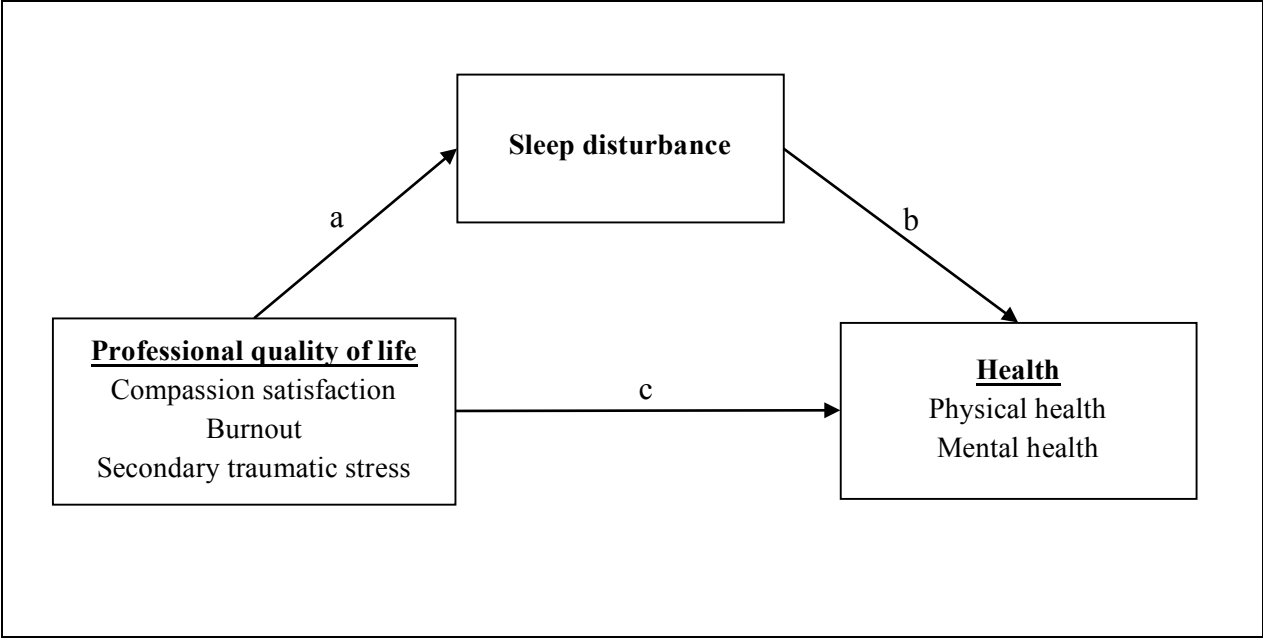

Note. The dependent variable results from the direct effect of the independent variable (path c) as well as the mediating variable (path b). Variable mediating the independent variable can also be involved (path a).
